# Supplementary material
Source: ML conference proceedings conference paper supplement (https://proceedings.neurips.cc/paper_files/paper/2023/hash/e10a6a906ef323efaf708f76cf3c1d1e-Abstract.html)
Supplement: Supplementary file 1 [file e10a6a906ef323efaf708f76cf3c1d1e-Supplemental-Conference.pdf]

---

# CoDet: Co-Occurrence Guided Region-Word Alignment for Open-Vocabulary Object Detection

---

Anonymous Author(s)

Affiliation

Address

email

## 1 Contents

|   |                                                      |   |
|---|------------------------------------------------------|---|
| 2 | A A Heuristic Baseline for Co-occurrence Discovery   | 1 |
| 3 | B Further Analysis on Different Alignment Strategies | 2 |
| 4 | C Visualization on OV-LVIS and OV-COCO               | 2 |
| 5 | D Implementation Details                             | 3 |
| 6 | A A Heuristic Baseline for Co-occurrence Discovery   |   |

7 In this section, we introduce the baseline method used for ablation study in Table 4b (main paper)  
8 in more detail. This baseline is adapted from a recently proposed image co-segmentation method  
9 ReCo [6]. As shown in Figure 1, it basically consists of four steps to identify the co-occurring  
10 object in the query image: First, it estimates pair-wise region similarity between region proposals of  
11 the query image and support images, which is the same as CoDet. This yields a similarity matrix  
12  $\mathbf{S} \in \mathbb{R}^{n \times m \times n}$ , where  $n$  stands for the number of proposals per image, and  $m$  stands for the number  
13 of support images. Second, it applies a max operator on the last dimension of  $\mathbf{S}$ , which serves to  
14 find the nearest neighbor in each support image for each region proposal in the query image. This  
15 reduces  $\mathbf{S}$  to an  $n \times m$  matrix. Third, it applies a mean operator on the second dimension of  $\mathbf{S}$  to  
16 derive the average support that each proposal has among the support images. Finally, it identifies the  
17 co-occurring object as the one with the highest average maximum similarity (support) among support  
18 images, by applying an argmax operator on the first dimension of  $\mathbf{S}$ .

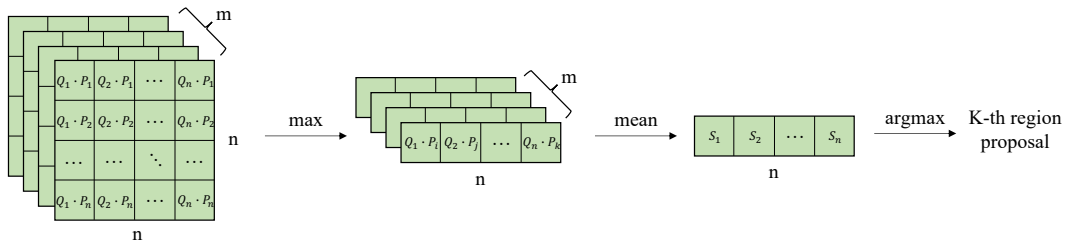

Figure 1: **Illustration of the baseline method for co-occurrence discovery.**  $Q$  and  $P$  are region proposals in the query image and support images, respectively.  $S$  is the averaged maximum similarity score across support images.

## 19 B Further Analysis on Different Alignment Strategies

20 Complementing the discourse in Section 4.5 (main paper), we further delineate the performance  
 21 of different alignment strategies with respect to novel category  $AP_{50}$  on OV-COCO in Figure 2.  
 22 It can be seen that strategies based on region-region similarity or hand-crafted rules (max-size)  
 23 show steady improvement in novel object recognition across training, whereas the performance of  
 24 region-word similarity-based method is highly unstable and even decreases in the early stage. A  
 25 possible explanation is that solely relying on region-word similarity to align regions and words may  
 26 be more susceptible to errors in pseudo-labels. For instance, if the model incorrectly matches the  
 27 text label ‘seagull’ with the object ‘dove’ at the initial phase, its supervision signal would pull the  
 28 two closer in the shared feature space. This negative feedback could directly harm the following  
 29 pseudo-labeling process, thus, there is a higher probability for the model to make the same mistake.

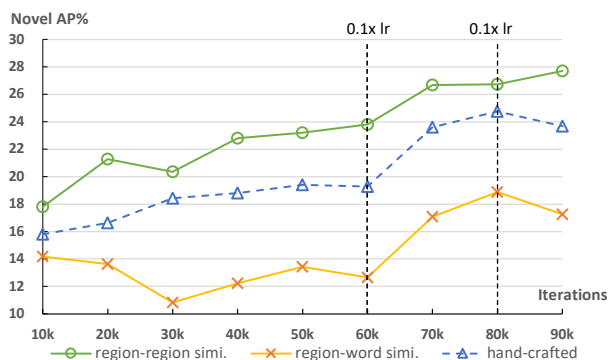

Figure 2: Performance of different alignment strategies at discrete training stages on OV-COCO.

## 30 C Visualization on OV-LVIS and OV-COCO

31 We visualize more detection results of CoDet in Figure 3 and Figure 4. On OV-LVIS, we can see that  
 32 CoDet successfully detects many rare objects, *e.g.*, gas mask, puffin, horse buggy, heron, satchel, and  
 33 so on (Figure 3). This validates that CoDet can efficiently leverage web-crawled image-text pairs to  
 34 learn open-word knowledge for novel object recognition. On OV-COCO, our method continues to  
 35 demonstrate strong open-vocabulary capability and correctly detects some hard samples, *e.g.*, the  
 36 occluded ‘tie’ and ‘elephant’ (upper left of Figure 4). Nevertheless, we also notice that the prediction  
 37 scores for novel categories are generally lower than base categories, which suggests the model is  
 38 biased towards base classes in OV-COCO. Such tendency to overfit base categories is also observed  
 39 in other works [8, 3, 7], due to the small training vocabulary of OV-COCO. We believe adopting  
 40 tricks like focal loss could alleviate this issue and further benefit our method.

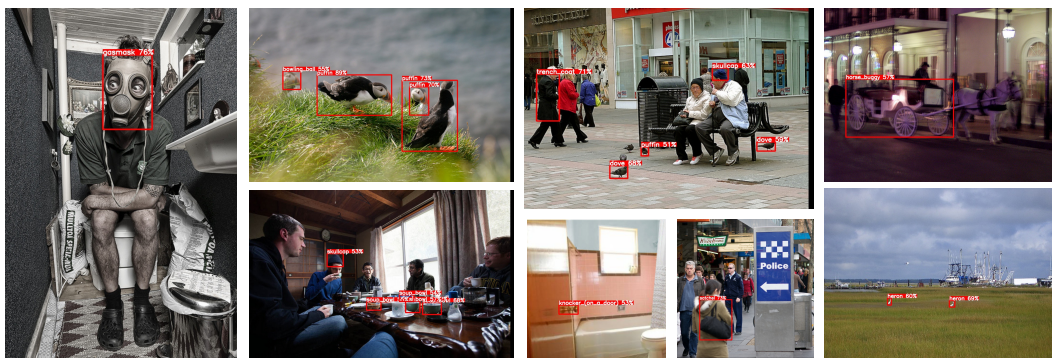

Figure 3: Visualization of prediction results by CoDet on OV-LVIS. For clarity, we only show results for novel categories.

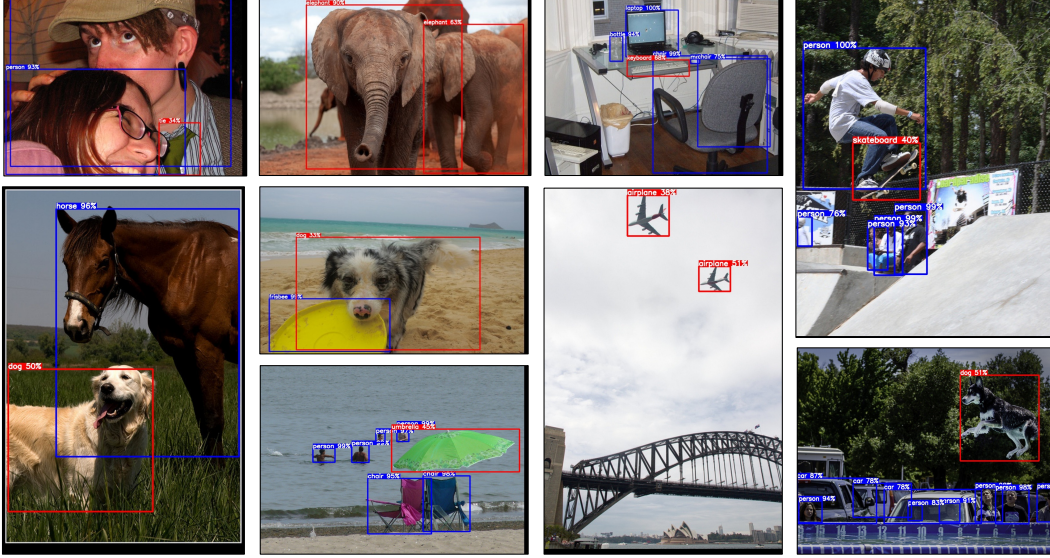

Figure 4: **Visualization of prediction results by CoDet on OV-COCO.** Red boxes are for novel categories, while blue boxes are for base categories.

## 41 D Implementation Details

42 Table 1 lists the detailed hyper-parameter configuration used for our OV-LVIS and OV-COCO  
 43 experiments. We follow Detic [9] to use low input resolution and large batch size for caption data  
 44 to achieve better trade-off between efficiency and performance. For experiments employing Swin-  
 45 Base [5] as the visual backbone, the settings are mostly the same as ResNet50 [2], except that a higher  
 46 resolution (896 for detection and 448 for caption) is adopted to maintain fair comparison with [9, 4].

Table 1: **Hyper-parameter configuration of CoDet.** LSJ stands for large scale jittering [1]. Resolu-  
 tion refers to the resized short side length of input images.

| Configuration                             | OV-LVIS | OV-COCO    |
|-------------------------------------------|---------|------------|
| Optimizer                                 | AdamW   | SGD        |
| Gradient clipping                         | True    | True       |
| Learning rate (LR)                        | 2e-4    | 2e-2       |
| Total iterations                          | 90k     | 90k        |
| Warmup iterations                         | 1k      | —          |
| Step decay factor                         | —       | 0.1×       |
| Step decay schedule                       | —       | [60k, 80k] |
| Data augmentation                         | LSJ     | none       |
| Batch size (detection)                    | 8       | 2          |
| Batch size (caption)                      | 32      | 8          |
| Resolution (detection)                    | 640     | 800        |
| Resolution (caption)                      | 320     | 400        |
| Detection/Caption data ratio              | 1:4     | 1:4        |
| Federated loss [10]                       | True    | False      |
| Repeat factor sampling                    | True    | False      |
| $\mathcal{L}_{\text{region-word}}$ weight | 0.2     | 0.1        |
| $\mathcal{L}_{\text{image-text}}$ weight  | 0.2     | 0.1        |

## 47 References

- 48 [1] Golnaz Ghiasi, Yin Cui, Aravind Srinivas, Rui Qian, Tsung-Yi Lin, Ekin D Cubuk, Quoc V Le, and Barret  
49 Zoph. Simple copy-paste is a strong data augmentation method for instance segmentation. In *Proceedings*  
50 *of the IEEE/CVF Conference on Computer Vision and Pattern Recognition*, pages 2918–2928, 2021. 3
- 51 [2] Kaiming He, Xiangyu Zhang, Shaoqing Ren, and Jian Sun. Deep residual learning for image recognition.  
52 In *Proceedings of the IEEE Conference on Computer Vision and Pattern Recognition*, pages 770–778,  
53 2016. 3
- 54 [3] Weicheng Kuo, Yin Cui, Xiuye Gu, AJ Piergiovanni, and Anelia Angelova. Open-vocabulary object  
55 detection upon frozen vision and language models. In *The Eleventh International Conference on Learning*  
56 *Representations*, 2023. 2
- 57 [4] Chuang Lin, Peize Sun, Yi Jiang, Ping Luo, Lizhen Qu, Gholamreza Haffari, Zehuan Yuan, and Jianfei Cai.  
58 Learning object-language alignments for open-vocabulary object detection. In *The Eleventh International*  
59 *Conference on Learning Representations*, 2023. 3
- 60 [5] Ze Liu, Yutong Lin, Yue Cao, Han Hu, Yixuan Wei, Zheng Zhang, Stephen Lin, and Baining Guo. Swin  
61 transformer: Hierarchical vision transformer using shifted windows. In *Proceedings of the IEEE/CVF*  
62 *International Conference on Computer Vision*, pages 10012–10022, 2021. 3
- 63 [6] Gyungin Shin, Weidi Xie, and Samuel Albanie. Reco: Retrieve and co-segment for zero-shot transfer. In  
64 *Advances in Neural Information Processing Systems*, volume 35, pages 33754–33767, 2022. 1
- 65 [7] Size Wu, Wenwei Zhang, Sheng Jin, Wentao Liu, and Chen Change Loy. Aligning bag of regions for  
66 open-vocabulary object detection. *arXiv preprint arXiv:2302.13996*, 2023. 2
- 67 [8] Yiwu Zhong, Jianwei Yang, Pengchuan Zhang, Chunyuan Li, Noel Codella, Liunian Harold Li, Luowei  
68 Zhou, Xiyang Dai, Lu Yuan, Yin Li, et al. Regionclip: Region-based language-image pretraining. In  
69 *Proceedings of the IEEE/CVF Conference on Computer Vision and Pattern Recognition*, pages 16793–  
70 16803, 2022. 2
- 71 [9] Xingyi Zhou, Rohit Girdhar, Armand Joulin, Philipp Krähenbühl, and Ishan Misra. Detecting twenty-  
72 thousand classes using image-level supervision. In *Computer Vision–ECCV 2022: 17th European Con-*  
73 *ference, Tel Aviv, Israel, October 23–27, 2022, Proceedings, Part IX*, pages 350–368. Springer, 2022.  
74 3
- 75 [10] Xingyi Zhou, Vladlen Koltun, and Philipp Krähenbühl. Probabilistic two-stage detection. *arXiv preprint*  
76 *arXiv:2103.07461*, 2021. 3
